# Supplementary material for: Heavy Metal-Resistant Filamentous Fungi as Potential Mercury Bioremediators
Source: MDPI journal article supplement (doi:10.3390/jof7050386), 2021-05-14
Supplement: s1 [file s1]

**Table S1.** Recovery of metals in NIST certified reference 2711a (Montana II Soil) and correction factors obtained by portable X-ray fluorescence spectrometry; values represent mean (n = 5).

| Element | Certified value<br>Mean $\pm$ U <sup>a</sup><br>(mg/kg) | Found value<br>Mean $\pm$ CI <sup>b</sup><br>(mg/kg) | Recovery<br>Mean $\pm$ CI <sup>b</sup><br>(%) | Correction<br>factor |
|---------|---------------------------------------------------------|------------------------------------------------------|-----------------------------------------------|----------------------|
| Cd      | 54.1 $\pm$ 0.5                                          | 58.6 $\pm$ 5.1                                       | 108 $\pm$ 9                                   | 0.923                |
| Cu      | 140 $\pm$ 2                                             | 118 $\pm$ 4                                          | 85 $\pm$ 4                                    | 1.186                |
| Hg      | 7.42 $\pm$ 0.18                                         | 11.68 $\pm$ 1.60                                     | 157 $\pm$ 13                                  | 0.635                |
| Pb      | 1400 $\pm$ 10                                           | 1374 $\pm$ 11                                        | 98 $\pm$ 1                                    | 1.019                |
| Zn      | 414 $\pm$ 11                                            | 356 $\pm$ 14                                         | 86 $\pm$ 4                                    | 1.162                |

<sup>a</sup>U is the expanded uncertainty for 95% confidence level (k=2);

<sup>b</sup>CI is the confidence interval for 95% confidence level (n=5).

**Table S2.** GenBank accession numbers assigned for heavy metal resistant fungal isolates (with Tolerance Index  $\geq$  0.5 for at least one of the metals assessed) germane to contaminated soils in Turda, Romania.

| Isolate ID | Species                      | GenBank accession number |
|------------|------------------------------|--------------------------|
| P2.1       | <i>Sarocladium kiliense</i>  | MT913526                 |
| P2.2       | <i>Sarocladium kiliense</i>  | MT913527                 |
| P2.5       | <i>Fusarium oxysporum</i>    | MN519436                 |
| P2.7       | <i>Fusarium oxysporum</i>    | MT913528                 |
| P2.9       | <i>Penicillium crustosum</i> | MT913529                 |
| P2.10      | <i>Phoma costaricensis</i>   | MT913530                 |
| P2.12      | <i>Stagonosporopsis</i> sp.  | MT913531                 |
| P2.14      | <i>Fusarium oxysporum</i>    | MT913532                 |
| P2.15      | <i>Mortierella alpina</i>    | MT913533                 |
| P2.16      | <i>Didymella glomerata</i>   | MT913534                 |
| T1         | <i>Mortierella alpina</i>    | MT913535                 |
| T2         | <i>Cladosporium</i> sp.      | MT913536                 |
| T3         | <i>Fusarium oxysporum</i>    | MT913537                 |
| T4         | <i>Mortierella alpina</i>    | MT913538                 |
| T8         | <i>Fusarium equiseti</i>     | MT913539                 |
| T14        | <i>Lecanicillium</i> sp.     | MT913540                 |
| T16        | <i>Mortierella alpina</i>    | MT913541                 |
| T21        | <i>Sarocladium kiliense</i>  | MT913542                 |
| T23        | <i>Mortierella alpina</i>    | MT913543                 |
| T25        | <i>Sarocladium</i> sp.       | MT913544                 |
| T27        | <i>Fusarium oxysporum</i>    | MT913545                 |
| T28        | <i>Fusarium solani</i>       | MT913546                 |

|         |                                   |          |
|---------|-----------------------------------|----------|
| T30     | <i>Aspergillus</i> sp.            | MT913547 |
| T32     | <i>Cladosporium macrocarpum</i>   | MT913548 |
| T33     | <i>Aspergillus</i> sp.            | MT913549 |
| T34     | <i>Sarocladium kiliense</i>       | MT913550 |
| T36     | <i>Cadophora malorum</i>          | MT913551 |
| T37     | <i>Cadophora malorum</i>          | MT913552 |
| T39     | <i>Sarocladium kiliense</i>       | MT913553 |
| TRD3.2  | <i>Cladosporium</i> sp.           | MT913554 |
| TRD5.5  | <i>Penicillium brevicompactum</i> | MT913555 |
| TRD5P.6 | <i>Sarocladium kiliense</i>       | MT913556 |

**Table S3.** Mean growth diameters of fungal isolates tested for Minimum Inhibitory Concentration.

| Species                   | Isolate | Metal | Metal concentration (mg/L) | Diameter mean (mm) $\pm$ SE (n=3-9) |
|---------------------------|---------|-------|----------------------------|-------------------------------------|
| <i>Fusarium oxysporum</i> | P2.5    | Hg    | 0                          | 82.83 $\pm$ 0.40                    |
|                           |         |       | 80                         | 51.67 $\pm$ 0.41                    |
|                           |         |       | 120                        | 34.93 $\pm$ 0.42                    |
|                           |         |       | 140                        | 6.00 $\pm$ 0.00                     |
|                           |         | Pb    | 518                        | 33.33 $\pm$ 0.25                    |
|                           |         |       | 1036                       | 16.17 $\pm$ 0.10                    |
|                           |         |       | 1568                       | 6.00 $\pm$ 0.00                     |
|                           |         |       | 490                        | 51.83 $\pm$ 0.84                    |
|                           |         | Zn    | 653                        | 42.67 $\pm$ 0.25                    |
|                           |         |       | 1176                       | 23.83 $\pm$ 0.19                    |
|                           |         |       | 1569                       | 15.50 $\pm$ 0.25                    |
|                           |         |       | 2092                       | 7.50 $\pm$ 0.73                     |
|                           |         |       | 2353                       | 6.50 $\pm$ 0.17                     |
|                           | P2.7    | Hg    | 0                          | 85.00 $\pm$ 0.00                    |
|                           |         |       | 80                         | 85.00 $\pm$ 0.00                    |
|                           |         |       | 120                        | 55.86 $\pm$ 1.11                    |
|                           |         |       | 140                        | 28.75 $\pm$ 0.71                    |
|                           |         |       | 180                        | 24.50 $\pm$ 0.93                    |
|                           |         |       | 200                        | 6.00 $\pm$ 0.00                     |
|                           |         | Pb    | 518                        | 33.33 $\pm$ 0.38                    |
|                           |         |       | 1036                       | 15.00 $\pm$ 2.02                    |
|                           |         |       | 1568                       | 6.00 $\pm$ 0.00                     |
|                           |         | Zn    | 490                        | 49.33 $\pm$ 0.35                    |
|                           |         |       | 653                        | 41.00 $\pm$ 0.44                    |
|                           |         |       | 1176                       | 22.50 $\pm$ 0.17                    |
|                           |         |       | 1569                       | 15.00 $\pm$ 0.45                    |
|                           |         |       | 1830                       | 11.83 $\pm$ 0.19                    |
|                           |         |       | 2092                       | 6.33 $\pm$ 0.10                     |

|                                 |                                |              |             |              |     |              |
|---------------------------------|--------------------------------|--------------|-------------|--------------|-----|--------------|
| <i>Sarocladium<br/>kiliense</i> | P2.2                           | Hg           | 0           | 32.25 ± 0.10 |     |              |
|                                 |                                |              | 40          | 30.17 ± 0.10 |     |              |
|                                 |                                |              | 160         | 9.17 ± 0.16  |     |              |
|                                 |                                |              | 200         | 6.33 ± 0.16  |     |              |
|                                 |                                | Cd           | 63.5        | 29.50 ± 0.41 |     |              |
|                                 |                                |              | 127         | 20.83 ± 0.08 |     |              |
|                                 |                                |              | 254         | 10.00 ± 0.00 |     |              |
|                                 |                                |              | 381         | 6.00 ± 0.00  |     |              |
|                                 |                                | Pb           | 518         | 12.83 ± 0.08 |     |              |
|                                 |                                |              | 1036        | 7.00 ± 0.00  |     |              |
|                                 |                                |              | 2072        | 6.33 ± 0.16  |     |              |
|                                 |                                |              | TRD5P6      | Hg           | 0   | 43.58 ± 0.31 |
| 30                              | 38.67 ± 0.19                   |              |             |              |     |              |
| 80                              | 26.50 ± 0.17                   |              |             |              |     |              |
| 160                             | 11.30 ± 0.19                   |              |             |              |     |              |
| Cd                              | 168                            | 28.00 ± 0.00 |             |              |     |              |
|                                 | 224                            | 23.00 ± 0.33 |             |              |     |              |
|                                 | 281                            | 18.92 ± 0.06 |             |              |     |              |
|                                 | 337                            | 15.00 ± 0.29 |             |              |     |              |
|                                 | 337                            | 10.50 ± 0.17 |             |              |     |              |
|                                 | <i>Didymella<br/>glomerata</i> | P2.16        |             | Hg           | 0   | 74.83 ± 0.35 |
|                                 |                                |              |             |              | 80  | 45.67 ± 1.67 |
|                                 |                                |              |             |              | 160 | 14.33 ± 0.19 |
| 200                             |                                |              | 7.17 ± 0.67 |              |     |              |
| <i>Phoma<br/>costaricensis</i>  | P2.10                          | Hg           | 0           | 55.17 ± 1.18 |     |              |
|                                 |                                |              | 30          | 53.17 ± 1.18 |     |              |
|                                 |                                |              | 80          | 41.00 ± 1.8  |     |              |
|                                 |                                |              | 160         | 6.00 ± 0.00  |     |              |
| <i>Cladosporium<br/>sp.</i>     | TRD3.2                         | Hg           | 0           | 31.17 ± 1.49 |     |              |
|                                 |                                |              | 10          | 29.50 ± 0.44 |     |              |
|                                 |                                |              | 30          | 26.17 ± 1.40 |     |              |
|                                 |                                |              | 80          | 24.67 ± 0.19 |     |              |
|                                 |                                |              | 160         | 6.00 ± 0.00  |     |              |
